# Supplementary material
Source: MDPI journal article supplement (https://www.mdpi.com/1996-1073/16/6/2870)
Supplement: s1 [file s1]

### Supplementary Materials

The supplementary materials present the coefficients,  $R^2$ , and MAE of the model at the flow rate of 850 mL/min in Table S1.

**Table S1.** The coefficients,  $R^2$ , and MAE of the model at the flow rate of 850 mL/min.

| Initial temperature | Position | $\alpha$ | $\beta$ | $\gamma$ | $\delta$ | $R^2$ * | MAE (training) | MAE (validation) |
|---------------------|----------|----------|---------|----------|----------|---------|----------------|------------------|
| 25 °C               | B1T      | 0.315    | 0.635   | 0.275    | -45.426  | 0.984   | 0.30           | 0.41             |
|                     | B1M      | 3.071    | 0.583   | 0.103    | -117.019 | 0.984   | 0.37           | 0.33             |
|                     | B1B      | 3.433    | 0.507   | 0.151    | -110.795 | 0.983   | 0.35           | 0.34             |
|                     | A1T      | 7.870    | 0.352   | 0.049    | -106.977 | 0.981   | 0.34           | 0.34             |
|                     | A1M      | 1.374    | 0.868   | 0.023    | -28.129  | 0.992   | 0.26           | 0.41             |
|                     | A1B      | 2.469    | 1.012   | -0.106   | 37.827   | 0.986   | 0.33           | 0.43             |
|                     | C1T      | 5.482    | 0.392   | 0.072    | -123.632 | 0.990   | 0.29           | 0.31             |
|                     | C1B      | 0.568    | 0.798   | 0.148    | -20.626  | 0.996   | 0.16           | 0.49             |
|                     | D1T      | 3.586    | 0.468   | 0.196    | -93.724  | 0.986   | 0.28           | 0.32             |
|                     | D1M      | 3.739    | 0.715   | -0.045   | -91.662  | 0.985   | 0.37           | 0.23             |
|                     | D1B      | 2.617    | 0.676   | 0.102    | -69.956  | 0.986   | 0.32           | 0.32             |
|                     | E1T      | 4.296    | 0.509   | 0.067    | -76.600  | 0.985   | 0.30           | 0.35             |
|                     | E1M      | 3.659    | 0.695   | -0.032   | -97.057  | 0.985   | 0.38           | 0.32             |
|                     | E1B      | 0.426    | 0.849   | 0.121    | -13.763  | 0.997   | 0.15           | 0.38             |
|                     | D2T      | 5.038    | 0.362   | 0.129    | -147.938 | 0.987   | 0.31           | 0.32             |
|                     | D2M      | 1.079    | 0.812   | 0.074    | -57.106  | 0.992   | 0.27           | 0.31             |
|                     | D2B      | 3.955    | 0.425   | 0.196    | -119.144 | 0.977   | 0.38           | 0.39             |
| 35 °C               | B1T      | -4.264   | 1.046   | 0.191    | 49.565   | 0.985   | 0.51           | 0.62             |
|                     | B1M      | 0.329    | 0.859   | 0.077    | -25.984  | 0.993   | 0.42           | 0.40             |
|                     | B1B      | 1.072    | 0.769   | 0.099    | -26.020  | 0.991   | 0.41           | 0.43             |
|                     | A1T      | 3.151    | 0.767   | 0.098    | 19.090   | 0.992   | 0.39           | 0.40             |
|                     | A1M      | 0.792    | 0.938   | 0.018    | -7.405   | 0.996   | 0.29           | 0.55             |
|                     | A1B      | 3.234    | 0.985   | -0.082   | 25.530   | 0.994   | 0.35           | 0.36             |
|                     | C1T      | 0.767    | 0.795   | 0.100    | -10.866  | 0.994   | 0.33           | 0.44             |
|                     | C1B      | 0.625    | 0.827   | 0.115    | -12.805  | 0.997   | 0.22           | 0.51             |
|                     | D1T      | 1.182    | 0.706   | 0.158    | -42.756  | 0.994   | 0.33           | 0.49             |
|                     | D1M      | 1.217    | 0.955   | -0.023   | -4.814   | 0.992   | 0.43           | 0.28             |
|                     | D1B      | 1.187    | 0.869   | 0.036    | -11.231  | 0.994   | 0.34           | 0.40             |
|                     | E1T      | 1.424    | 0.691   | 0.138    | -43.944  | 0.994   | 0.31           | 0.40             |
|                     | E1M      | 1.072    | 0.939   | -0.022   | -11.199  | 0.993   | 0.40           | 0.37             |
|                     | E1B      | 0.679    | 0.857   | 0.097    | -10.270  | 0.998   | 0.19           | 0.41             |
|                     | D2T      | -0.287   | 0.778   | 0.170    | -20.616  | 0.991   | 0.42           | 0.46             |
|                     | D2M      | 0.001    | 0.914   | 0.075    | -19.549  | 0.996   | 0.31           | 0.37             |
|                     | D2B      | 1.205    | 0.708   | 0.156    | -30.231  | 0.989   | 0.44           | 0.46             |

\* The  $R^2$  of the model for the top layer is calculated from the response part.
